# Supplementary material
Source: PubMed Central journal article supplement (PMC8139823)
Supplement: NIHMS1695057-supplement-Appendix.pdf [file NIHMS1695057-supplement-Appendix.pdf]

## APPENDIX

### Federal Poverty Level (FPL) Imputation Procedure:

Following the work of Sommers et al. (2015), we used an imputation procedure to convert the household income data contained in the Behavioral Risk Factor Surveillance System to FPL percentage. We first converted each of the survey's income categories into a dollar term using the midpoint of the category range (e.g. \$30,000 for people reporting household income between \$25,000 and \$35,000). We then used household size and the U.S. federal poverty guidelines to convert income into a percentage of FPL.

Citation:

Sommers BD, Gunja MZ, Finegold K, Musco T. Changes in Self-Reported Insurance Coverage, Access to Care, and Health Under the Affordable Care Act. *JAMA*. 2015;314(4):366.

### Regression Analyses:

As described in the main text, all regression models were estimated as linear probability models with BRFSS sampling weights. Additionally, all models were stratified to enable assessment of differential trends by household income group and state Medicaid expansion status. All vectors are bolded, while scalars are not.

We first estimated simple models to determine unadjusted changes in access:

$$(1) \quad Y_{ist} = \alpha + \boldsymbol{\beta}_t + \varepsilon_{ist}$$

Where  $i$  represents individuals,  $s$  represents states, and  $t$  represents time period of the survey.  $\boldsymbol{\beta}_t$  are quarterly fixed effects with separate dummy variables for each quarter 2011-2017, and  $\varepsilon_{ist}$  is the error term. With the fourth quarter of 2013 set as the reference group, the vector  $\boldsymbol{\beta}_t$  reflects unadjusted changes in mean outcomes relative to the period just before the rollout of the ACA.

We then used an interrupted time series design to quantify changes in access outcomes 2013-2017, controlling for longer run trends and observed covariates. These models were of the form:

$$(2) \quad Y_{ist} = \alpha_s \times \boldsymbol{\beta}_{st} + \boldsymbol{\gamma}_{t.post} + \boldsymbol{\delta}X_{it} + \varepsilon_{ist}$$

where  $\alpha_s$  are state fixed effects,  $\boldsymbol{\beta}_{st}$  are state-specific linear time trends,  $X_{it}$  is a vector of observed individual characteristics and  $\boldsymbol{\gamma}_{t.post}$  are a set of indicator variables for whether the respondent was interviewed in each quarter of 2014 through 2017, after rollout of the ACA.  $\boldsymbol{\gamma}_{t.post}$  are thus our regression-adjusted estimates of the changes in outcomes associated with the Affordable Care Act rollout, after controlling for observed covariates and pre-existing time trends 2011-2013.

The difference in outcomes associated with the transition from the Obama to Trump administration is the difference between  $\boldsymbol{\gamma}_{2016q4}$  for the fourth quarter of 2016 and the  $\boldsymbol{\gamma}_{t.post}$  for

each quarter of 2017. Wald tests were used to test whether these differences were statistically significant.

To examine changes in coverage disparities, the sample for these comparisons were limited to the high and low groups. For instance, when quantifying changes in income-based disparities respondents in the middle-income group (138% to 400% FPL) were excluded. We then interacted our interrupted time series model (2) with an indicator for the ‘high’ group, in this case whether the respondent’s household income was >400% FPL:

$$(3) \quad Y_{ist} = \alpha_s + \alpha'_s Inc400_i + \beta_{st} + \beta'_{st} Inc400_i + \gamma_{t.post} + \gamma'_{t.post} Inc400_i + \delta X_{it} + \delta X_{it} Inc400_i + \varepsilon_{ist}$$

where  $\alpha$ ,  $\beta$ ,  $\gamma$ , and  $\delta$  are main effects and  $\alpha'$ ,  $\beta'$ ,  $\gamma'$ , and  $\delta'$  are coefficients on the interaction of each term with a binary indicator for household income >400% FPL. The vector  $\gamma'_{t.post}$  denotes changes in absolute disparities in outcomes between high- and low-income groups relative to the fourth quarter of 2013. The difference in disparities associated with the transition from the Obama to Trump administrations is the difference between  $\gamma'_{2016q4}$  and  $\gamma'_{t.post}$  for each quarter of 2017. Wald tests were used to test whether these differences were statistically significant.

**Exhibit A1. Characteristics of the Study Sample**

| Variable               | Expansion States |                         | Non-Expansion States |                         |
|------------------------|------------------|-------------------------|----------------------|-------------------------|
|                        | Frequency        | Weighted % <sup>1</sup> | Frequency            | Weighted % <sup>1</sup> |
| Sex                    |                  |                         |                      |                         |
| Male                   | 576,012          | 49.9                    | 363,736              | 49.7                    |
| Female                 | 736,922          | 50.1                    | 479,700              | 50.3                    |
| Marital Status         |                  |                         |                      |                         |
| Unmarried              | 566,209          | 47.9                    | 338,837              | 46.1                    |
| Married                | 746,725          | 52.1                    | 504,599              | 53.9                    |
| Children in household  |                  |                         |                      |                         |
| No                     | 820,089          | 62.5                    | 516,475              | 61.2                    |
| Yes                    | 492,845          | 37.5                    | 326,961              | 38.8                    |
| Age Group              |                  |                         |                      |                         |
| 18-24                  | 104,363          | 15.9                    | 69,485               | 16.2                    |
| 25-29                  | 89,687           | 10.2                    | 59,980               | 10.2                    |
| 30-34                  | 105,161          | 11.3                    | 71,209               | 11.4                    |
| 35-39                  | 113,046          | 9.7                     | 74,727               | 9.9                     |
| 40-44                  | 125,013          | 10.7                    | 79,499               | 10.8                    |
| 45-49                  | 147,380          | 9.8                     | 91,243               | 9.7                     |
| 50-54                  | 188,802          | 12.2                    | 117,612              | 11.9                    |
| 55-59                  | 214,019          | 10.4                    | 134,753              | 10.0                    |
| 60-64                  | 225,463          | 9.9                     | 144,928              | 9.9                     |
| Race/Ethnicity         |                  |                         |                      |                         |
| White                  | 975,271          | 62.3                    | 638,820              | 60.8                    |
| Black                  | 103,529          | 10.1                    | 92,988               | 16.2                    |
| Hispanic               | 122,283          | 17.4                    | 65,667               | 17.1                    |
| Other                  | 78,746           | 8.6                     | 31,999               | 4.5                     |
| Multiracial            | 33,105           | 1.6                     | 13,962               | 1.4                     |
| Educational Attainment |                  |                         |                      |                         |
| Less than high school  | 88,784           | 13.6                    | 66,041               | 14.5                    |
| High school grad       | 343,090          | 27.4                    | 236,015              | 28.6                    |
| Some college           | 359,962          | 31.0                    | 248,618              | 32.0                    |
| College graduate       | 521,098          | 28.0                    | 292,762              | 24.9                    |
| Household Income Group |                  |                         |                      |                         |
| <138% FPL              | 382,002          | 35.0                    | 273,658              | 37.9                    |
| 138 to 400% FPL        | 575,800          | 42.2                    | 377,761              | 42.0                    |
| >400% FPL              | 355,132          | 22.8                    | 192,017              | 20.1                    |
| Employment Status      |                  |                         |                      |                         |
| Unemployed             | 90,529           | 8.3                     | 52,844               | 7.9                     |
| Employed               | 886,937          | 66.3                    | 561,200              | 65.8                    |
| Not in labor force     | 335,468          | 25.4                    | 229,392              | 26.3                    |
| Homeownership Status   |                  |                         |                      |                         |
| Renter                 | 437,847          | 37.8                    | 260,919              | 35.3                    |
| Homeowner              | 875,087          | 62.2                    | 582,517              | 64.7                    |

**SOURCE:** Authors' analysis of data from the Behavioral Risk Factor Surveillance System

(BRFSS). **NOTES:** <sup>1</sup>Data are adjusted by BRFSS sampling weights.

**Exhibit A2. Unadjusted measures of health care access, 2011-2017**

| Strata               | Outcome            | 2011  |       |       |       | 2012  |       |       |       | 2013  |       |       |       | 2014  |       |       |       |
|----------------------|--------------------|-------|-------|-------|-------|-------|-------|-------|-------|-------|-------|-------|-------|-------|-------|-------|-------|
|                      |                    | Q1    | Q2    | Q3    | Q4    |
| Overall              | Uninsured          | 20.6% | 21.3% | 22.5% | 22.9% | 21.4% | 22.0% | 22.2% | 23.3% | 21.0% | 20.9% | 21.5% | 20.8% | 18.3% | 16.7% | 16.3% | 16.9% |
| Overall              | No personal doctor | 24.0% | 25.6% | 25.9% | 27.2% | 25.3% | 26.0% | 25.6% | 27.5% | 27.0% | 27.8% | 28.8% | 27.7% | 27.0% | 26.9% | 26.2% | 27.0% |
| Overall              | Avoided care       | 18.7% | 18.8% | 19.8% | 20.4% | 19.0% | 19.2% | 18.5% | 20.0% | 18.7% | 18.5% | 19.1% | 17.5% | 16.7% | 17.1% | 16.8% | 15.8% |
| <138% FPL            | Uninsured          | 37.1% | 38.3% | 39.1% | 39.4% | 38.3% | 38.9% | 39.7% | 40.6% | 36.4% | 37.0% | 36.8% | 35.8% | 32.5% | 29.1% | 27.6% | 28.6% |
| <138% FPL            | No personal doctor | 35.5% | 37.9% | 37.1% | 38.8% | 36.1% | 37.3% | 36.6% | 38.2% | 36.7% | 38.8% | 39.4% | 38.3% | 36.3% | 35.1% | 34.4% | 36.7% |
| <138% FPL            | Avoided care       | 33.1% | 32.1% | 32.9% | 33.7% | 32.7% | 32.5% | 32.1% | 33.6% | 31.4% | 31.4% | 31.7% | 30.0% | 28.7% | 29.2% | 27.7% | 26.0% |
| 138-400% FPL         | Uninsured          | 13.3% | 13.5% | 14.4% | 14.6% | 14.4% | 14.9% | 15.2% | 15.3% | 13.7% | 12.7% | 14.7% | 14.0% | 12.1% | 11.5% | 11.3% | 11.4% |
| 138-400% FPL         | No personal doctor | 19.0% | 20.0% | 20.3% | 21.5% | 20.8% | 21.1% | 21.0% | 22.8% | 23.0% | 22.2% | 24.7% | 22.9% | 23.3% | 24.1% | 23.3% | 22.9% |
| 138-400% FPL         | Avoided care       | 12.7% | 13.1% | 14.2% | 13.9% | 13.9% | 13.8% | 13.2% | 14.3% | 13.4% | 12.4% | 13.6% | 11.9% | 11.7% | 11.9% | 12.2% | 11.4% |
| >400% FPL            | Uninsured          | 6.9%  | 7.6%  | 8.2%  | 7.9%  | 7.2%  | 6.6%  | 6.9%  | 8.1%  | 7.3%  | 7.1%  | 7.1%  | 7.3%  | 6.3%  | 5.8%  | 5.8%  | 6.2%  |
| >400% FPL            | No personal doctor | 14.7% | 15.6% | 16.7% | 16.5% | 16.4% | 15.8% | 16.3% | 17.2% | 17.5% | 18.2% | 17.6% | 18.1% | 18.2% | 18.4% | 17.6% | 17.3% |
| >400% FPL            | Avoided care       | 6.0%  | 7.2%  | 7.1%  | 8.1%  | 6.8%  | 6.8%  | 6.1%  | 6.9%  | 6.6%  | 6.7%  | 6.9%  | 6.3%  | 6.1%  | 6.7%  | 6.3%  | 6.0%  |
| Non-Expansion States | Uninsured          | 23.5% | 26.6% | 26.4% | 28.4% | 24.7% | 24.8% | 26.7% | 27.4% | 25.9% | 24.1% | 25.2% | 25.5% | 22.1% | 21.2% | 20.8% | 20.7% |
| Non-Expansion States | No personal doctor | 25.6% | 29.3% | 28.6% | 31.8% | 28.8% | 28.6% | 29.2% | 31.2% | 30.8% | 30.9% | 31.2% | 31.1% | 30.4% | 31.1% | 30.0% | 29.8% |
| Non-Expansion States | Avoided care       | 21.2% | 22.0% | 22.5% | 24.0% | 21.0% | 21.5% | 21.3% | 23.3% | 21.8% | 20.2% | 21.7% | 20.0% | 18.8% | 19.2% | 19.1% | 18.0% |
| Expansion States     | Uninsured          | 19.1% | 18.4% | 19.9% | 19.3% | 19.6% | 20.2% | 19.7% | 20.4% | 17.6% | 19.2% | 19.5% | 17.8% | 15.7% | 13.2% | 13.4% | 15.1% |
| Expansion States     | No personal doctor | 23.2% | 23.5% | 24.1% | 24.2% | 23.4% | 24.2% | 23.5% | 24.8% | 24.4% | 26.1% | 27.5% | 25.4% | 24.5% | 23.7% | 23.9% | 25.6% |
| Expansion States     | Avoided care       | 17.4% | 17.1% | 18.0% | 18.1% | 18.0% | 17.7% | 16.9% | 17.8% | 16.7% | 17.6% | 17.6% | 15.9% | 15.2% | 15.4% | 15.3% | 14.7% |

**SOURCE:** Authors' analysis of data from the Behavioral Risk Factor Surveillance System (BRFSS). **NOTES:** All columns show unadjusted population proportions, accounting for BRFSS sampling weights.

**Exhibit A2. Unadjusted measures of health care access, 2011-2017 (continued)**

| Strata               | Outcome            | 2015  |       |       |       | 2016  |       |       |       | 2017  |       |       |       |
|----------------------|--------------------|-------|-------|-------|-------|-------|-------|-------|-------|-------|-------|-------|-------|
|                      |                    | Q1    | Q2    | Q3    | Q4    | Q1    | Q2    | Q3    | Q4    | Q1    | Q2    | Q3    | Q4    |
| Overall              | Uninsured          | 14.2% | 14.5% | 15.7% | 14.9% | 13.1% | 13.9% | 14.8% | 14.1% | 13.5% | 14.7% | 14.6% | 15.8% |
| Overall              | No personal doctor | 25.2% | 25.4% | 25.7% | 25.6% | 25.7% | 25.9% | 26.8% | 25.9% | 26.1% | 26.9% | 26.7% | 27.2% |
| Overall              | Avoided care       | 14.7% | 15.5% | 15.9% | 14.8% | 14.5% | 15.4% | 15.7% | 14.7% | 14.9% | 15.9% | 15.6% | 15.8% |
| <138% FPL            | Uninsured          | 24.5% | 25.4% | 27.7% | 25.7% | 22.9% | 24.3% | 25.7% | 24.8% | 23.2% | 24.9% | 24.6% | 27.5% |
| <138% FPL            | No personal doctor | 33.7% | 33.3% | 34.3% | 33.1% | 33.5% | 33.9% | 34.5% | 34.1% | 32.5% | 33.3% | 34.1% | 35.8% |
| <138% FPL            | Avoided care       | 24.5% | 25.8% | 25.4% | 24.9% | 22.9% | 24.9% | 24.7% | 23.6% | 23.1% | 24.7% | 24.3% | 24.7% |
| 138-400% FPL         | Uninsured          | 10.0% | 10.2% | 11.3% | 11.3% | 9.5%  | 10.2% | 11.0% | 10.5% | 10.2% | 11.3% | 11.7% | 12.0% |
| 138-400% FPL         | No personal doctor | 21.8% | 22.9% | 23.0% | 23.6% | 23.3% | 23.8% | 24.8% | 23.7% | 25.1% | 25.7% | 25.0% | 24.9% |
| 138-400% FPL         | Avoided care       | 11.1% | 11.8% | 12.9% | 11.4% | 12.0% | 12.4% | 12.9% | 12.4% | 12.6% | 13.2% | 13.4% | 13.6% |
| >400% FPL            | Uninsured          | 5.9%  | 5.9%  | 5.3%  | 5.3%  | 4.7%  | 5.4%  | 6.1%  | 5.4%  | 5.3%  | 6.1%  | 6.1%  | 6.2%  |
| >400% FPL            | No personal doctor | 18.4% | 17.8% | 17.2% | 18.0% | 18.1% | 18.1% | 19.4% | 18.5% | 18.7% | 20.0% | 19.4% | 19.1% |
| >400% FPL            | Avoided care       | 6.3%  | 6.6%  | 6.9%  | 6.0%  | 6.2%  | 6.9%  | 7.8%  | 6.3%  | 7.0%  | 8.0%  | 7.6%  | 7.2%  |
| Non-Expansion States | Uninsured          | 19.0% | 18.7% | 20.9% | 18.8% | 17.2% | 19.0% | 19.4% | 18.4% | 19.0% | 19.7% | 19.5% | 21.7% |
| Non-Expansion States | No personal doctor | 31.0% | 29.0% | 29.1% | 29.0% | 28.7% | 30.6% | 31.0% | 29.4% | 31.3% | 30.9% | 30.0% | 31.5% |
| Non-Expansion States | Avoided care       | 17.5% | 17.7% | 18.9% | 17.7% | 17.8% | 18.7% | 18.5% | 17.0% | 18.4% | 19.1% | 18.2% | 19.3% |
| Expansion States     | Uninsured          | 11.3% | 11.8% | 12.2% | 12.5% | 11.0% | 10.6% | 11.1% | 12.1% | 10.2% | 10.9% | 11.9% | 12.6% |
| Expansion States     | No personal doctor | 21.8% | 23.0% | 23.4% | 23.5% | 24.1% | 22.8% | 23.4% | 24.3% | 23.1% | 23.9% | 24.7% | 24.8% |
| Expansion States     | Avoided care       | 13.1% | 14.1% | 13.9% | 13.1% | 12.7% | 13.2% | 13.4% | 13.6% | 12.8% | 13.4% | 14.2% | 13.8% |

**SOURCE:** Authors' analysis of data from the Behavioral Risk Factor Surveillance System (BRFSS). **NOTES:** All columns show unadjusted population proportions, accounting for BRFSS sampling weights.

Exhibit A3. Unadjusted changes from 2013-2017 in health care access by household income group and state Medicaid expansion status

|                          |                  | Non-Expansion States |                               |                               |                               |                               |
|--------------------------|------------------|----------------------|-------------------------------|-------------------------------|-------------------------------|-------------------------------|
| Outcome                  | Household Income | 2016Q4 <sup>1</sup>  | 2017Q1 vs 2016Q4 <sup>2</sup> | 2017Q2 vs 2016Q4 <sup>2</sup> | 2017Q3 vs 2016Q4 <sup>2</sup> | 2017Q4 vs 2016Q4 <sup>2</sup> |
| Uninsured                | <138% FPL        | -11.5****            | -0.3                          | -0.9                          | -1.6**                        | 4.7****                       |
|                          | 138-400% FPL     | -3.6****             | -0.2                          | 2.1****                       | 2.5****                       | 2.4****                       |
|                          | >400% FPL        | -1.0***              | -1.3**                        | 0.6                           | 1*                            | 0.1                           |
|                          | <b>Overall</b>   | <b>-7.5****</b>      | <b>0.6</b>                    | <b>1.4****</b>                | <b>1.1***</b>                 | <b>3.3****</b>                |
| No Personal Doctor       | <138% FPL        | -4.2****             | 1.2                           | 1.8**                         | 1.8**                         | 5.7****                       |
|                          | 138-400% FPL     | 3.0****              | 2.6****                       | 1.0*                          | 0.4                           | 0.3                           |
|                          | >400% FPL        | 3.7****              | -1.2                          | 0.2                           | -1.5**                        | -1.7**                        |
|                          | <b>Overall</b>   | <b>-0.4</b>          | <b>1.9****</b>                | <b>1.5****</b>                | <b>0.7</b>                    | <b>2.1****</b>                |
| Avoided Care Due to Cost | <138% FPL        | -6.9****             | -0.4                          | 0.4                           | -0.5                          | 1.5*                          |
|                          | 138-400% FPL     | -2.1****             | 1.5***                        | 2.2****                       | 2.1****                       | 2.2****                       |
|                          | >400% FPL        | -0.9**               | 0.2                           | 2.3****                       | 1.1**                         | 1.6***                        |
|                          | <b>Overall</b>   | <b>-4.9****</b>      | <b>1.4****</b>                | <b>2.2****</b>                | <b>1.3****</b>                | <b>2.3****</b>                |
|                          |                  | Expansion States     |                               |                               |                               |                               |
| Uninsured                | <138% FPL        | -13.5****            | -4.4****                      | -2.0****                      | -0.5                          | 0.2                           |
|                          | 138-400% FPL     | -3.7****             | -0.6*                         | -1.0***                       | 0.2                           | 0.8**                         |
|                          | >400% FPL        | -2.1****             | 0.4                           | 0.2                           | 0.3                           | 1.0****                       |
|                          | <b>Overall</b>   | <b>-7.3****</b>      | <b>-1.8****</b>               | <b>-1.2****</b>               | <b>-0.2</b>                   | <b>0.5**</b>                  |
| No Personal Doctor       | <138% FPL        | -2.5****             | -4.2****                      | -4.0****                      | -1.4**                        | -1.1*                         |
|                          | 138-400% FPL     | 2.0****              | 0.3                           | 1.7****                       | 1.5****                       | 1.5****                       |
|                          | >400% FPL        | 1.2****              | 0.8                           | 1.5***                        | 1.7****                       | 1.5***                        |
|                          | <b>Overall</b>   | <b>-0.2</b>          | <b>-1.2****</b>               | <b>-0.4</b>                   | <b>0.4</b>                    | <b>0.5</b>                    |
| Avoided Care Due to Cost | <138% FPL        | -9.1****             | -1.9***                       | -0.5                          | 0.6                           | 0.1                           |
|                          | 138-400% FPL     | -0.5**               | -0.5                          | -0.4                          | 0.4                           | 0.6*                          |
|                          | >400% FPL        | -0.2                 | 0.9***                        | 1.2****                       | 1.4****                       | 0.5*                          |
|                          | <b>Overall</b>   | <b>-3.9****</b>      | <b>-0.8***</b>                | <b>-0.2</b>                   | <b>0.6**</b>                  | <b>0.2</b>                    |

**SOURCE:** Authors' analysis of data from the Behavioral Risk Factor Surveillance System (BRFSS). **NOTES:** The exhibit displays percentage point changes for respondents reporting they are uninsured, do not have a personal doctor, or avoided care due to cost. <sup>1</sup>Counterfactual estimate of changes from the final quarter of 2013. <sup>2</sup>Wald test for the difference between two regression coefficients. \* p < .1, \*\* p < .05, \*\*\* p < .01, \*\*\*\* p < .001.

**Exhibit A4. Adjusted annual changes from 2013-2017 in health care access by household income group**

| Outcome                         | Household Income | 2016 <sup>1</sup> | 2017 vs. 2016 <sup>2</sup> |
|---------------------------------|------------------|-------------------|----------------------------|
| <b>Uninsured</b>                | <138% FPL        | -10.6****         | 1.3****                    |
|                                 | 138-400% FPL     | -5.0****          | 0.9****                    |
|                                 | >400% FPL        | -1.4****          | 0.9****                    |
|                                 | <b>Overall</b>   | <b>-7.0****</b>   | <b>0.9****</b>             |
| <b>No Personal Doctor</b>       | <138% FPL        | -6.2****          | -0.6**                     |
|                                 | 138-400% FPL     | -4.5****          | -0.3                       |
|                                 | >400% FPL        | -1.9****          | 0.2                        |
|                                 | <b>Overall</b>   | <b>-5.0****</b>   | <b>-0.3***</b>             |
| <b>Avoided Care Due to Cost</b> | <138% FPL        | -5.1****          | 0.9****                    |
|                                 | 138-400% FPL     | -0.4*             | 1.0****                    |
|                                 | >400% FPL        | 0.6***            | 0.9****                    |
|                                 | <b>Overall</b>   | <b>-2.6****</b>   | <b>0.8****</b>             |

**SOURCE:** Authors' analysis of data from the Behavioral Risk Factor Surveillance System (BRFSS). **NOTES:** The exhibit displays percentage point changes for respondents reporting they are uninsured, do not have a personal doctor, or avoided care due to cost. <sup>1</sup>Counterfactual estimate of changes from the final quarter of 2013. Models are adjusted for state-level time trends, survey quarter, and respondent demographics including race, household income, sex, home ownership, educational attainment, age, veteran status, household size, and whether children were present in the household. <sup>2</sup>Wald test for the difference between two regression coefficients. \* p < .1, \*\* p < .05, \*\*\* p < .01, \*\*\*\* p < .001.

**Exhibit A5. Adjusted annual changes from 2013-2017 in health care access by household income group and state Medicaid expansion status**

|                          |                  | Non-Expansion States |                           |
|--------------------------|------------------|----------------------|---------------------------|
| Outcome                  | Household Income | 2016 <sup>1</sup>    | 2017 vs 2016 <sup>2</sup> |
| Uninsured                | <138% FPL        | -7.7****             | 2.0****                   |
|                          | 138-400% FPL     | -4.9****             | 1.7****                   |
|                          | >400% FPL        | -1.6****             | 1.0****                   |
|                          | <b>Overall</b>   | <b>-6.1****</b>      | <b>1.6****</b>            |
| No Personal Doctor       | <138% FPL        | -4.1****             | 0.3                       |
|                          | 138-400% FPL     | -4.3****             | -0.4                      |
|                          | >400% FPL        | -0.9                 | -1.0***                   |
|                          | <b>Overall</b>   | <b>-4.0****</b>      | <b>-0.3</b>               |
| Avoided Care Due to Cost | <138% FPL        | -1.5**               | 1.3****                   |
|                          | 138-400% FPL     | -0.1                 | 1.6****                   |
|                          | >400% FPL        | 0.4                  | 0.3                       |
|                          | <b>Overall</b>   | <b>-1.2****</b>      | <b>1.2****</b>            |
|                          |                  | Expansion States     |                           |
| Uninsured                | <138% FPL        | -12.4****            | 0.9***                    |
|                          | 138-400% FPL     | -5.0****             | 0.4**                     |
|                          | >400% FPL        | -1.3****             | 0.9****                   |
|                          | <b>Overall</b>   | <b>-7.4****</b>      | <b>0.5****</b>            |
| No Personal Doctor       | <138% FPL        | -7.4****             | -1.2****                  |
|                          | 138-400% FPL     | -4.5****             | -0.2                      |
|                          | >400% FPL        | -2.4****             | 0.9****                   |
|                          | <b>Overall</b>   | <b>-5.5****</b>      | <b>-0.4**</b>             |
| Avoided Care Due to Cost | <138% FPL        | -7.4****             | 0.6**                     |
|                          | 138-400% FPL     | -0.6**               | 0.7****                   |
|                          | >400% FPL        | 0.8***               | 1.1****                   |
|                          | <b>Overall</b>   | <b>-3.3****</b>      | <b>0.6****</b>            |

**SOURCE:** Authors' analysis of data from the Behavioral Risk Factor Surveillance System (BRFSS). **NOTES:** The exhibit displays percentage point changes for respondents reporting they are uninsured, do not have a personal doctor, or avoided care due to cost. <sup>1</sup>Counterfactual estimate of changes from the final quarter of 2013. Models are adjusted for state-level time trends, survey quarter, and respondent demographics including race, household income, sex, home ownership, educational attainment, age, veteran status, household size, and whether children were present in the household. <sup>2</sup>Wald test for the difference between two regression coefficients. \* p < .1, \*\* p < .05, \*\*\* p < .01, \*\*\*\* p < .001.
